# Supplementary material
Source: PubMed Central journal article supplement (PMC4465342)
Supplement: NIHMS627428-supplement-Supp_FigureS1-S6.pdf [file NIHMS627428-supplement-Supp_FigureS1-S6.pdf]

Sup. Fig. 1

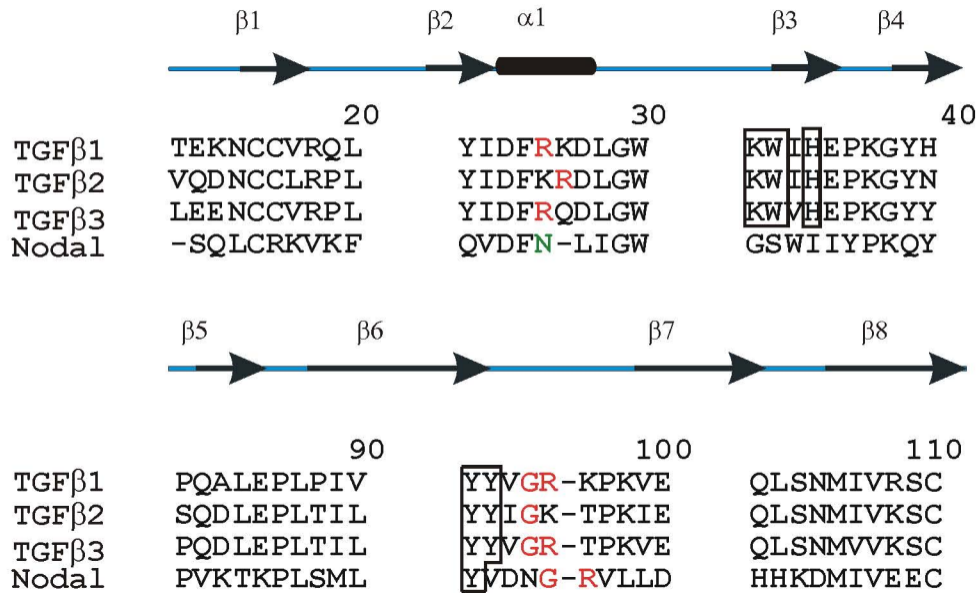

**Sup. Fig. 2.**

**A**

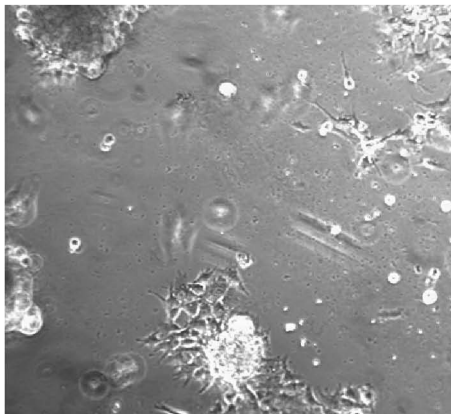

**B**

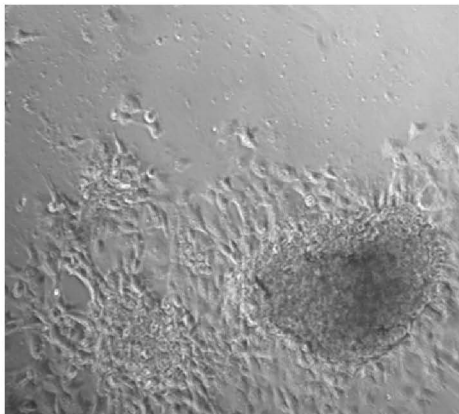

**DNTGRII on Matrigel**

**Sup. Fig.3.**

**C8161C**

**C8161+IgGC**

**C8161+anti-Nodal**

**24h**

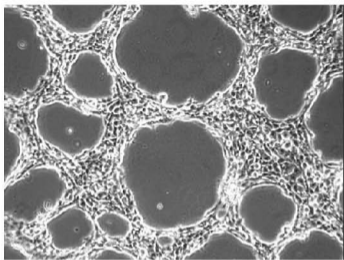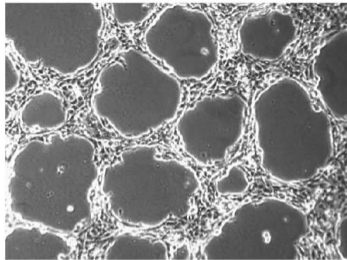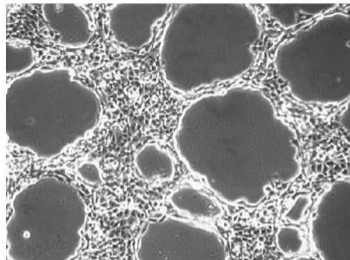

**96h**

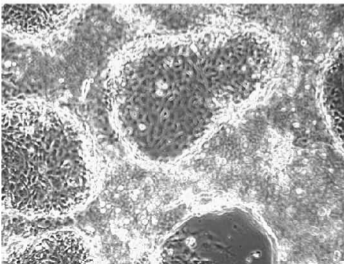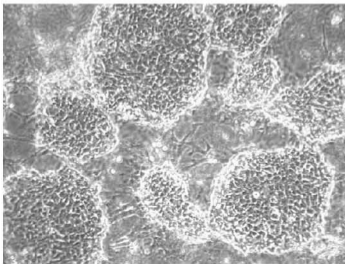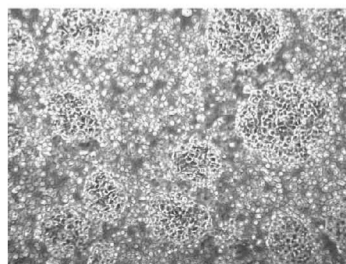

**Sup. Fig. 4.**

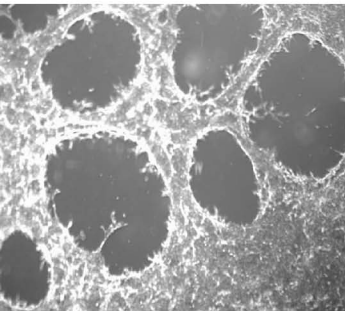

**C8161**

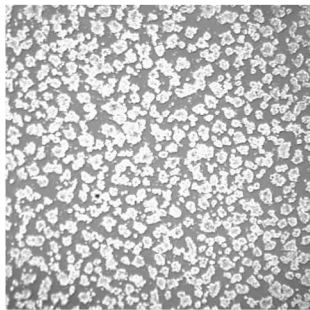

**UACC1273 C**

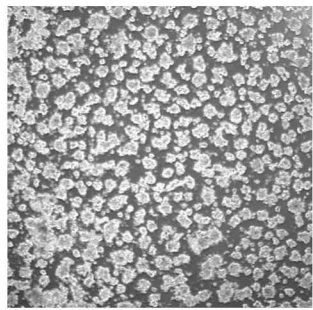

**UACC1273-TGF $\beta$ RII**

Sup.Fig 5

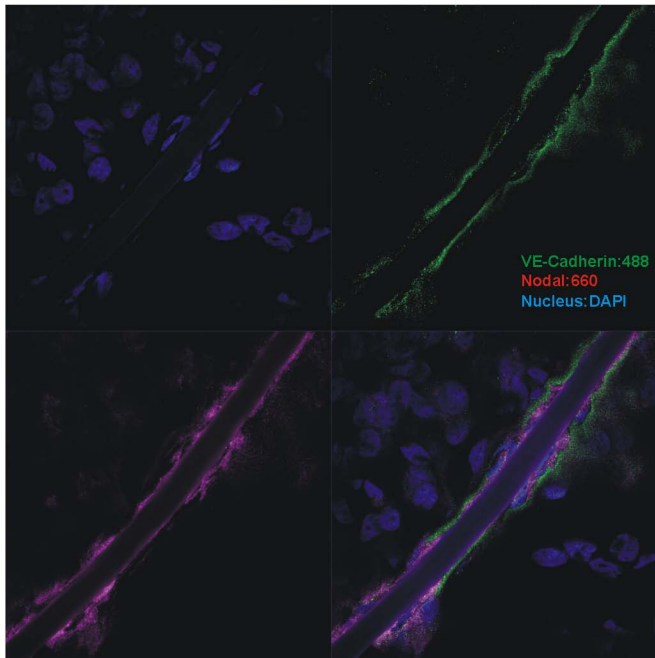

**Sup. Fig. 6**

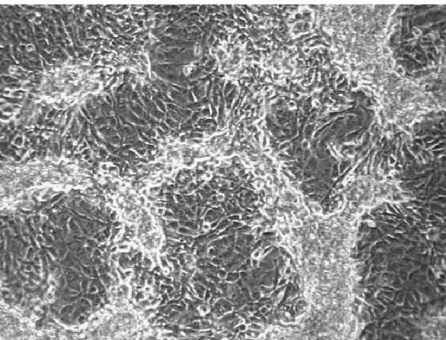

**Control**

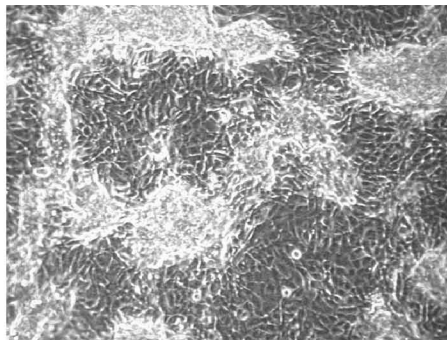

**+IgG Control**

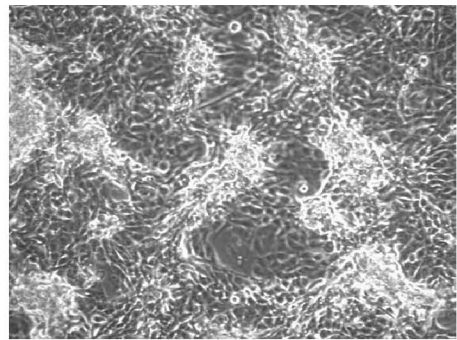

**+ $\alpha$ -PanTGF $\beta$**
